# Supplementary material
Source: PubMed Central journal article supplement (PMC3094142)
Supplement: supp_00019.2011_38779_1_art_file_907883_lgl0xq.pdf [file supp_00019.2011_38779_1_art_file_907883_lgl0xq.pdf]

**Supplementary Figure 1.** Time course of acyl ghrelin (**A** and **B**) and total ghrelin (**C** and **D**) levels after jejunal (**A** and **C**) or gastric (**B** and **D**) delivery of a liquid mixed-meal preoperatively and at 1 week and 6 weeks after RYGB. Preoperative mixed-meal delivery was oral (gastric) and is displayed on all graphs. Gastric delivery after RYGB was via a gastrostomy tube in the stomach fundus allowing nutrient contact with the bypassed foregut. Data are mean of 9 subjects  $\pm$  SEM.
