# Supplementary material
Source: PubMed Central journal article supplement (PMC3094142)

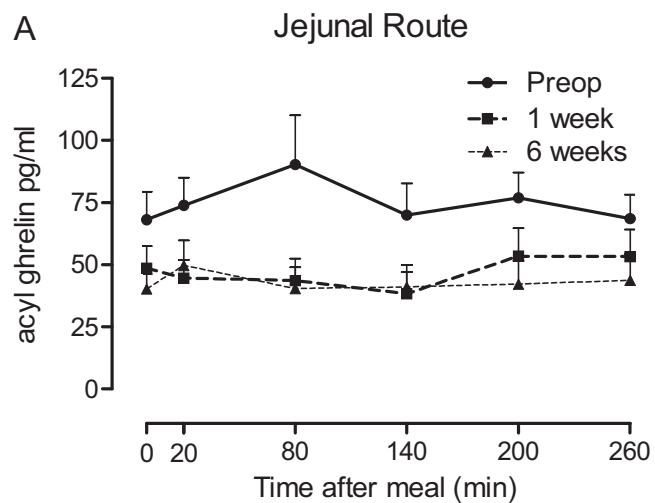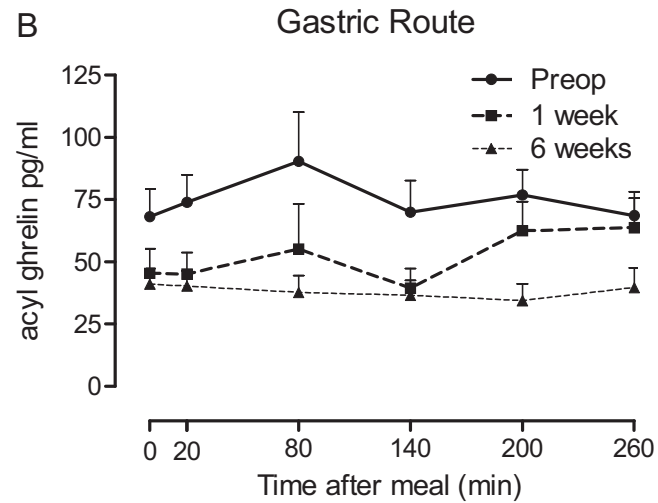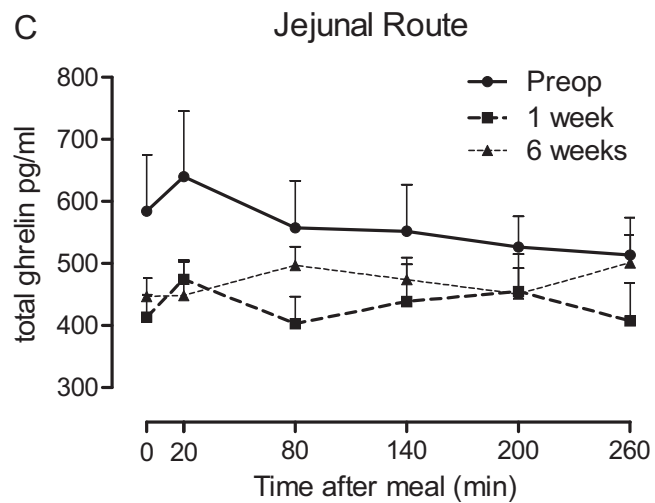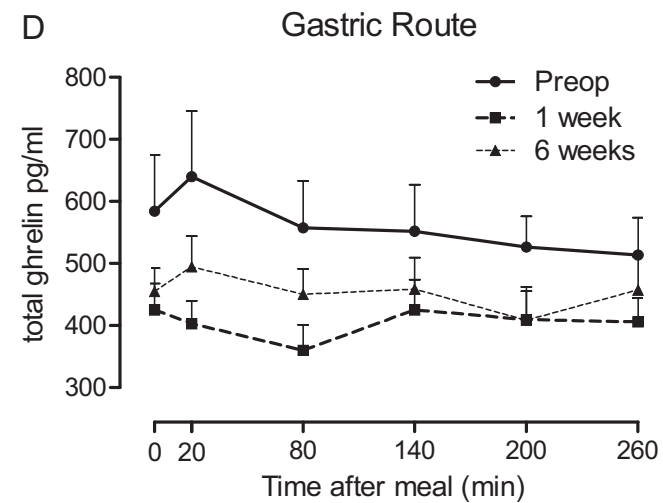

Supplement: supp_00019.2011_figS1.pdf [file supp_00019.2011_figS1.pdf]
